# Supplementary material for: Pore length control of mesoporous Co3O4and its influence on the capacity of porous electrodes for lithium-ion batteries
Source: Royal Society of Chemistry journal article supplement (doi:10.1039/c1ra00503k), 2011-12-23
Supplement: c1ra00503k.pdf [file c1ra00503k.pdf]

## Electronic Supplementary Information

### Pore length control of mesoporous $\text{Co}_3\text{O}_4$ and its influence on the capacity of porous electrodes for lithium-ion batteries

Zhenzhen Lin, Wenbo Yue, Dazhen Huang, Jiyun Hu, Xiaoying Zhang, Zhong-Yong Yuan and Xiaojing Yang

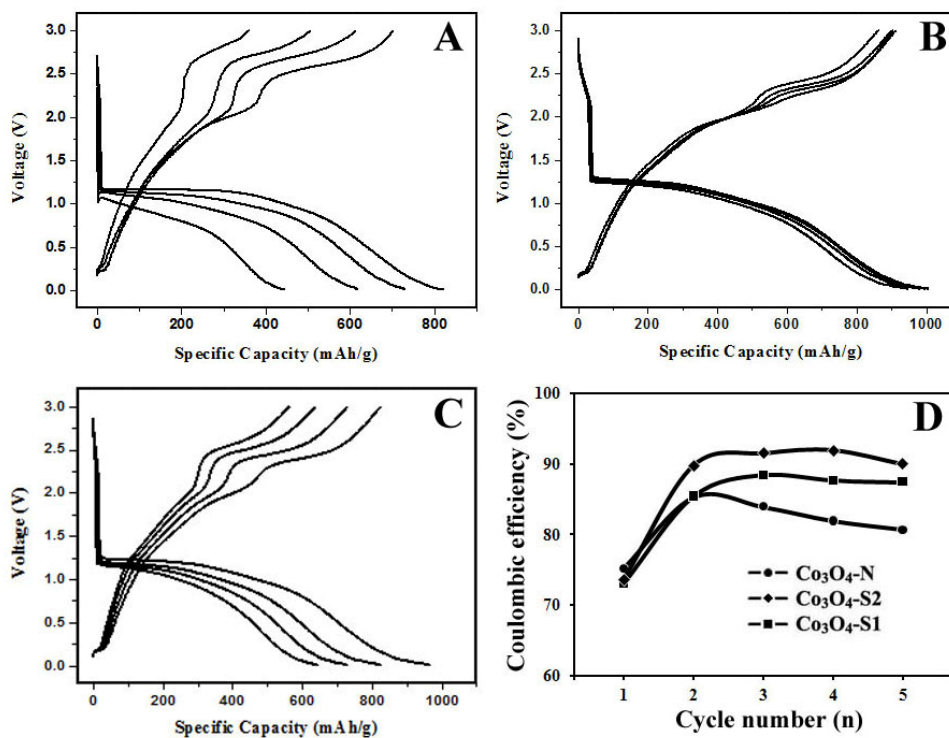

**Fig. S1** A~C, the 2<sup>nd</sup>~5<sup>th</sup> cycle charge-discharge curves for  $\text{Co}_3\text{O}_4$ -S1,  $\text{Co}_3\text{O}_4$ -S2,  $\text{Co}_3\text{O}_4$ -N at 1C in the voltage range 0.01~3.0 V and D, the Coulombic efficiency as a function of cycle numbers for different mesoporous  $\text{Co}_3\text{O}_4$  measured at 1C.

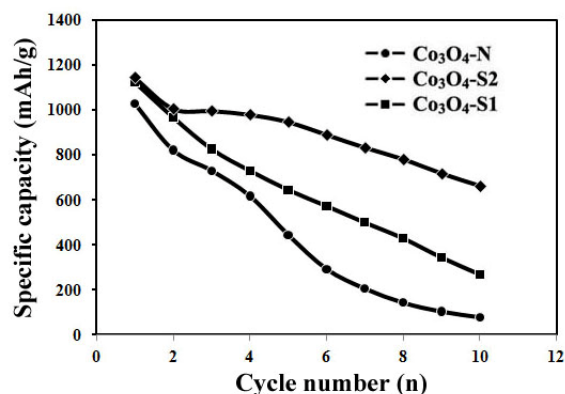

**Fig. S2** Discharge capacities as a function of cycle numbers for  $\text{Co}_3\text{O}_4$ -S1,  $\text{Co}_3\text{O}_4$ -S2 and  $\text{Co}_3\text{O}_4$ -N specimens measured at 1C in the voltage range 0.01~3.0 V.
